# Supplementary material for: Influence of nitrogen oxides and volatile organic compounds emission changes on tropospheric ozone variability, trends and radiative effect
Source: Copernicus journal article supplement (doi:10.5194/acp-25-8229-2025), 2025-07-30
Supplement: Supplementary file 1 [file acp-25-8229-2025-supplement.pdf]

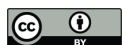

*Supplement of*

## **Influence of nitrogen oxides and volatile organic compounds emission changes on tropospheric ozone variability, trends and radiative effect**

**Suvarna Fadnavis et al.**

*Correspondence to:* Suvarna Fadnavis ([suvarna@tropmet.res.in](mailto:suvarna@tropmet.res.in))

The copyright of individual parts of the supplement might differ from the article licence.

Table S1. Primary volatile organic compounds. BIGALKANE is a lumped species for all alkanes C4 and greater, BIGENE lumps all alkenes C4 and greater.

| S.N. | VOCs name    |
|------|--------------|
| 1    | Benzene      |
| 2    | BIGALKANE    |
| 3    | BIGENE       |
| 4    | acetylene    |
| 5    | ethene       |
| 6    | ethanol      |
| 7    | ethane       |
| 8    | propene      |
| 9    | propane      |
| 10   | formaldehyde |
| 11   | acetaldehyde |
| 12   | acetone      |
| 13   | acetic acid  |
| 14   | methanol     |
| 15   | methane      |
| 16   | formic acid  |
| 17   | butan-2-one  |
| 18   | toluene      |
| 19   | xylenes      |

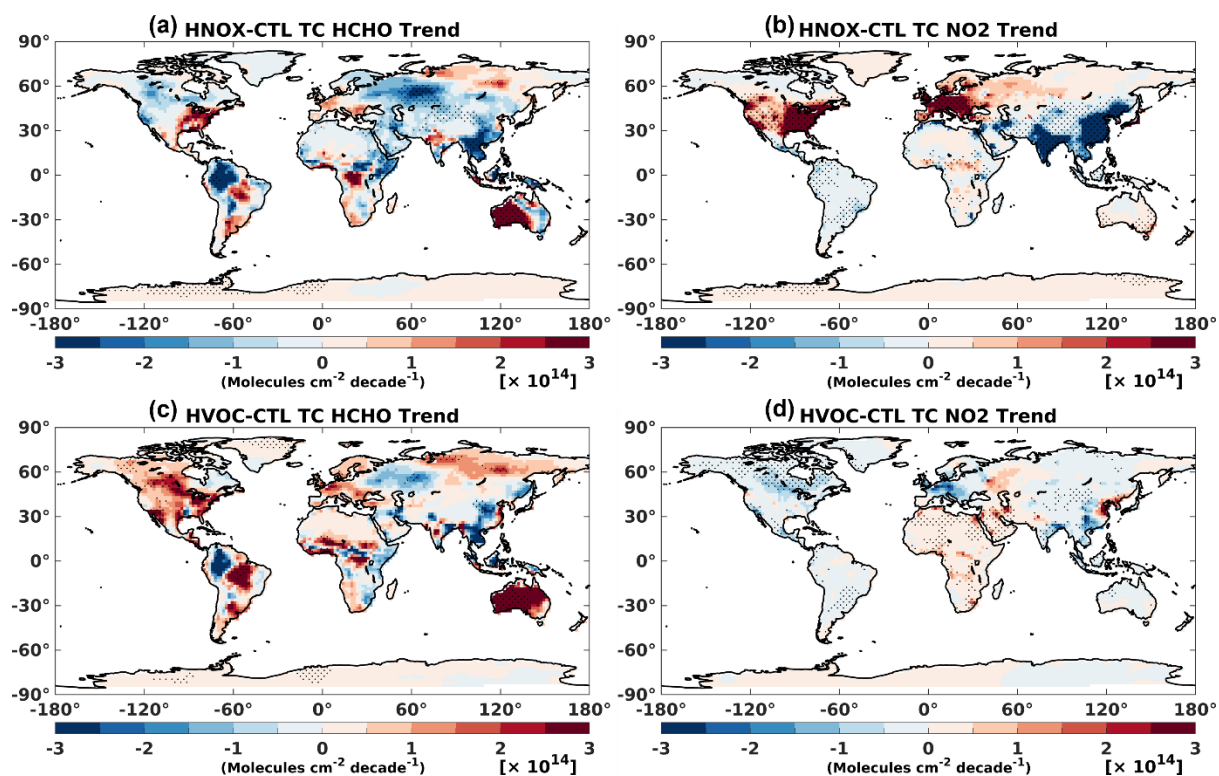

Figure S1. Trends in the tropospheric column (a) HCHO, (b) NO<sub>2</sub> during 1998 – 2019 from ECHAM6–HAMMOZ simulation for HNO<sub>x</sub> - CTL. (c–d) are the same as that of (a–b) but for HVOC - CTL simulation. The stippled region indicates the trend significant at 95% confidence based on the t-test.
